# Supplementary material
Source: MDPI journal article supplement (https://www.mdpi.com/2073-4395/12/10/2375)
Supplement: s1 [file s1]

## Litskas et al. Supplementary material.

**Table S1.** Examples of mitigation actions at farm level to manage carbon and GHG fluxes, identified to be relevant within the EU context. Adopted from [4] Items in italics are actions linked to this research.

| Group                        | Mitigation actions                                                                        |
|------------------------------|-------------------------------------------------------------------------------------------|
| Land use                     | Conversion of arable land to grassland to sequester SOC                                   |
|                              | Agroforestry                                                                              |
|                              | Wetland/peatland conservation/restoration                                                 |
|                              | Woodland planting                                                                         |
|                              | <i>Preventing deforestation and removal of farmland trees</i>                             |
|                              | <i>Management of existing woodland, hedgerows, woody buffer strips and farmland trees</i> |
| Cropland management          | Improved crop rotations                                                                   |
|                              | <i>Reduced and minimum tillage</i>                                                        |
|                              | <i>Leaving crop residues on the soil surface</i>                                          |
|                              | <i>Ceasing to burn crop residues and vegetation</i>                                       |
|                              | Use of cover/catch crops                                                                  |
| Livestock Management         | Livestock health management                                                               |
|                              | Use of sexed semen for breeding dairy replacements                                        |
|                              | Choosing breeds with lower methane emissions                                              |
|                              | Feed additives for ruminant diets                                                         |
|                              | Optimized feeding strategies for livestock                                                |
| Nutrient and Soil management | <i>Soil and nutrient management plans</i>                                                 |
|                              | Improved nitrogen efficiency                                                              |
|                              | Biological N fixation in rotations and in grass mixes                                     |
|                              | <i>Improved on-farm energy efficiency</i>                                                 |

**Table S2.** Soil physicochemical properties in the experimental vineyard. Average values and standard deviation (n=6) are provided for the composite samples collected from a depth of 0-40 cm.

| pH         | EC ( $\mu\text{S cm}^{-1}$ ) | Clay (%)             | Sand (%)              | Silt (%)             | OM (%)               | OC (%)                | N%                    |
|------------|------------------------------|----------------------|-----------------------|----------------------|----------------------|-----------------------|-----------------------|
| 7.6 (0.1)  | 441 (166)                    | 42 (4)               | 30 (2)                | 28 (3)               | 5.8 (0.1)            | 4.08 (0.26)           | 0.15 (0.01)           |
| C/N        | %CaCO <sub>3</sub>           | N g kg <sup>-1</sup> | Na g kg <sup>-1</sup> | K g kg <sup>-1</sup> | P g kg <sup>-1</sup> | Ca g kg <sup>-1</sup> | Mg g kg <sup>-1</sup> |
| 27.2 (1.4) | 34.9 (2.2)                   | 1.46 (0.11)          | 0.12 (0.01)           | 0.57 (0.08)          | 0.03 (0.02)          | 1.82 (0.85)           | 0.13 (0.02)           |

OM: Organic Matter; OC: Organic Carbon; EC: Electrical Conductivity.

**Table S3.** Physicochemical properties for the organic material. The average value and standard deviation (n=4) are provided.

| pH          | EC ( $\mu\text{S cm}^{-1}$ ) | C %         | N%          | C/N          |
|-------------|------------------------------|-------------|-------------|--------------|
| 7.52 (0.09) | 2833 (221)                   | 47.58 (0.5) | 2.66 (0.31) | 17.86 (2.59) |

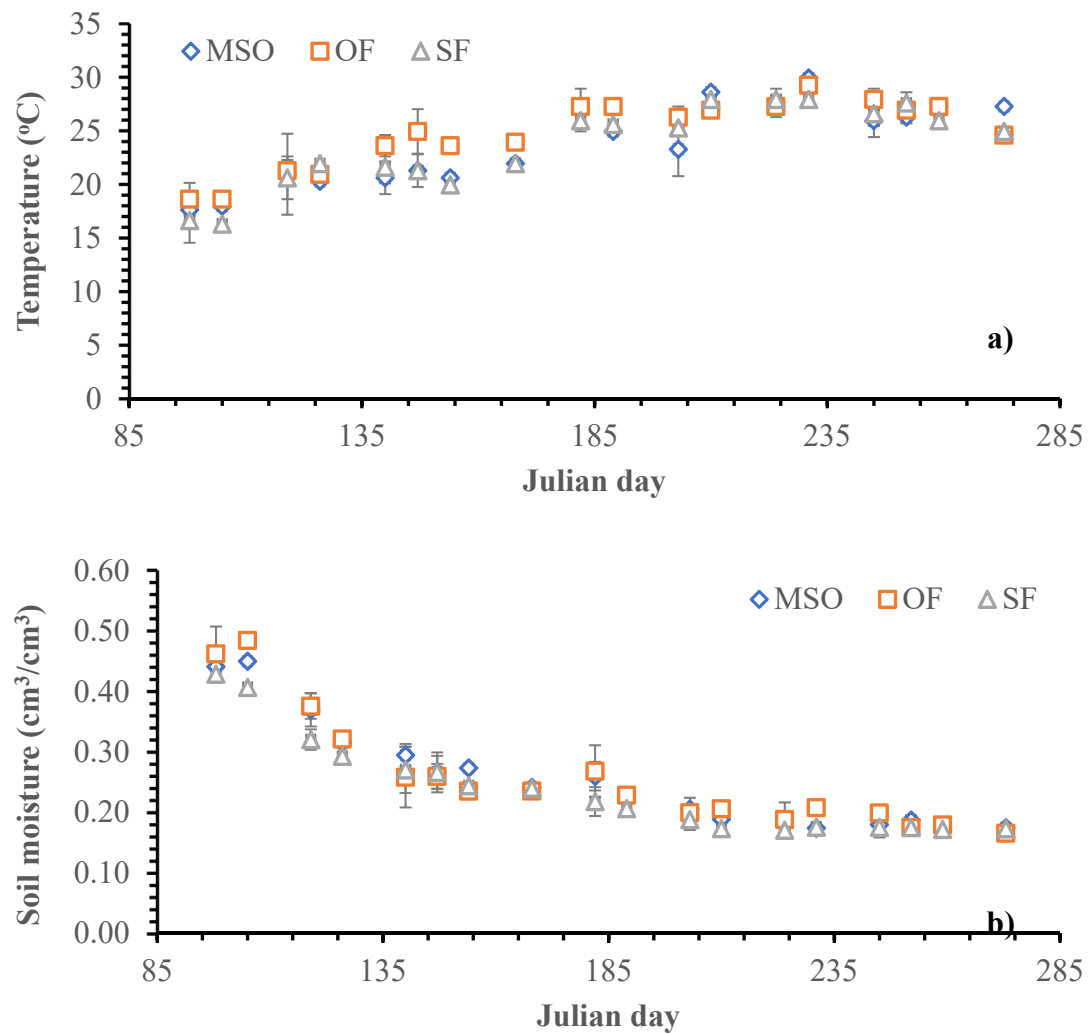

**Figure S1.** Average (stdev) soil temperature (a) and moisture (b) data for the three treatments (MSO, OF, SF) in the experimental vineyard.

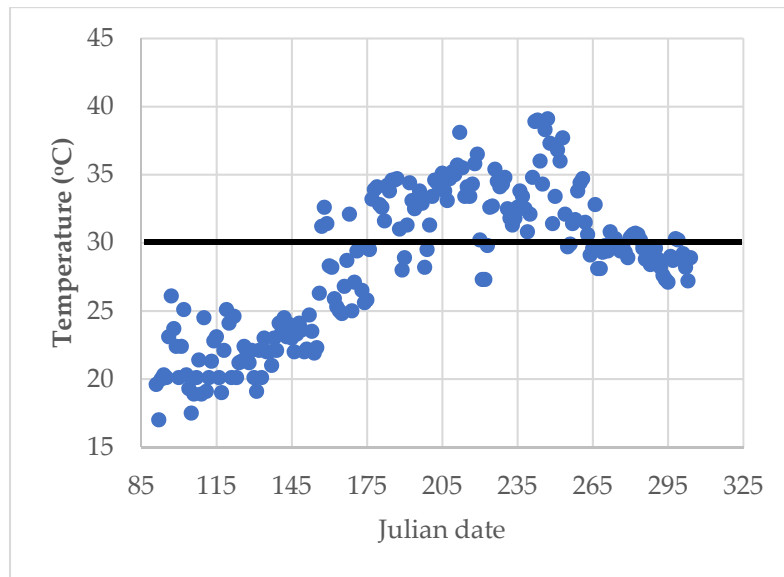

**Figure S2.** Maximum temperature in the experimental vineyard for the period 1/4/2020-31/10/2020.

**Figure S3.** Carbon balance in Xynisteri vines (average values in kg C per vine and standard deviation;  $n=3$ ). Berries (grapes; red colour) are not included as they are removed from the system at harvest.

| Treatment MSO (mix synth. + org. fertilizer)                                                                              |                                                                                   | Treatment OF (organic fertilizer)                                                                                         |                                           | Treatment SF (synthetic fertilizer)                                                                                       |                                          |
|---------------------------------------------------------------------------------------------------------------------------|-----------------------------------------------------------------------------------|---------------------------------------------------------------------------------------------------------------------------|-------------------------------------------|---------------------------------------------------------------------------------------------------------------------------|------------------------------------------|
| <b>C balance</b><br><b>-0.192 (0.030)</b>                                                                                 | 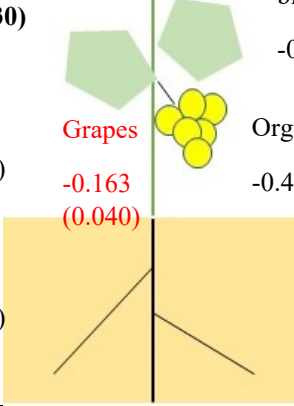 | Above ground biomass C<br>-0.483 (0.051)                                                                                  | <b>C balance</b><br><b>-0.091 (0.086)</b> |                                         | Above ground biomass C<br>-0.563 (0.047) |
| Soil respiration<br>0.762 (0.024)                                                                                         | <b>-0.163 (0.040)</b>                                                             | Org. fertilizer C<br>-0.433                                                                                               | Soil respiration<br>1.372 (0.170)         | <b>-0.195 (0.012)</b>                                                                                                     | Org. fertilizer C<br>-0.866              |
| Roots respiration<br>0.013 (0.003)                                                                                        |                                                                                   | Roots C<br>-0.051 (0.011)                                                                                                 | Roots respiration<br>0.013 (0.003)        |                                                                                                                           | Roots C<br>-0.047 (0.010)                |
| Soil C content 20.09 (1.40) kg C (OC measurement at the end of the experiment; per vine and 0.4 m <sup>3</sup> soil vol.) |                                                                                   | Soil C content 20.17 (0.98) kg C (OC measurement at the end of the experiment; per vine and 0.4 m <sup>3</sup> soil vol.) |                                           | Soil C content 19.59 (1.09) kg C (OC measurement at the end of the experiment; per vine and 0.4 m <sup>3</sup> soil vol.) |                                          |

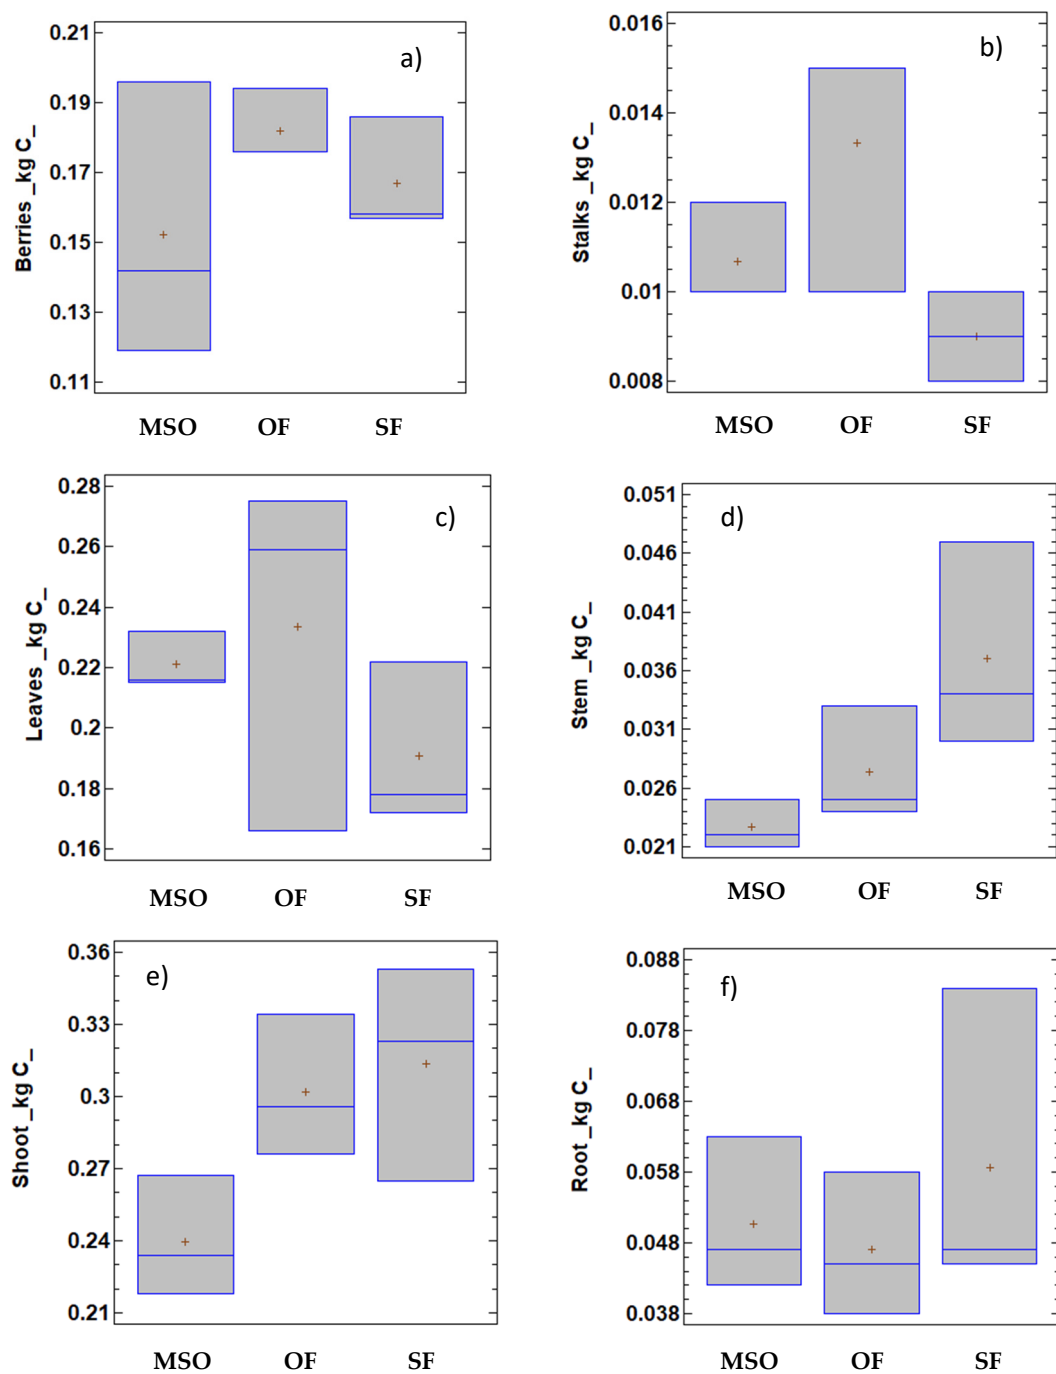

**Figure S4.** Biomass C (kg C) stored annually per vine and per plant part for the 3 treatments (MSO, OF, SF; see par. 2.3)

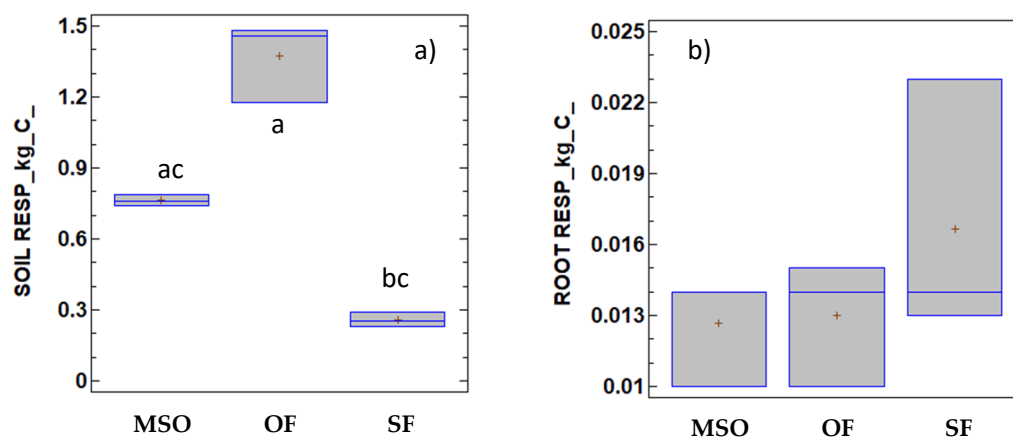

**Figure S5.** Soil (a) and root (b) respiration (kg C year<sup>-1</sup>) per vine and treatment. Different letter near the boxplots means statistically significant difference.

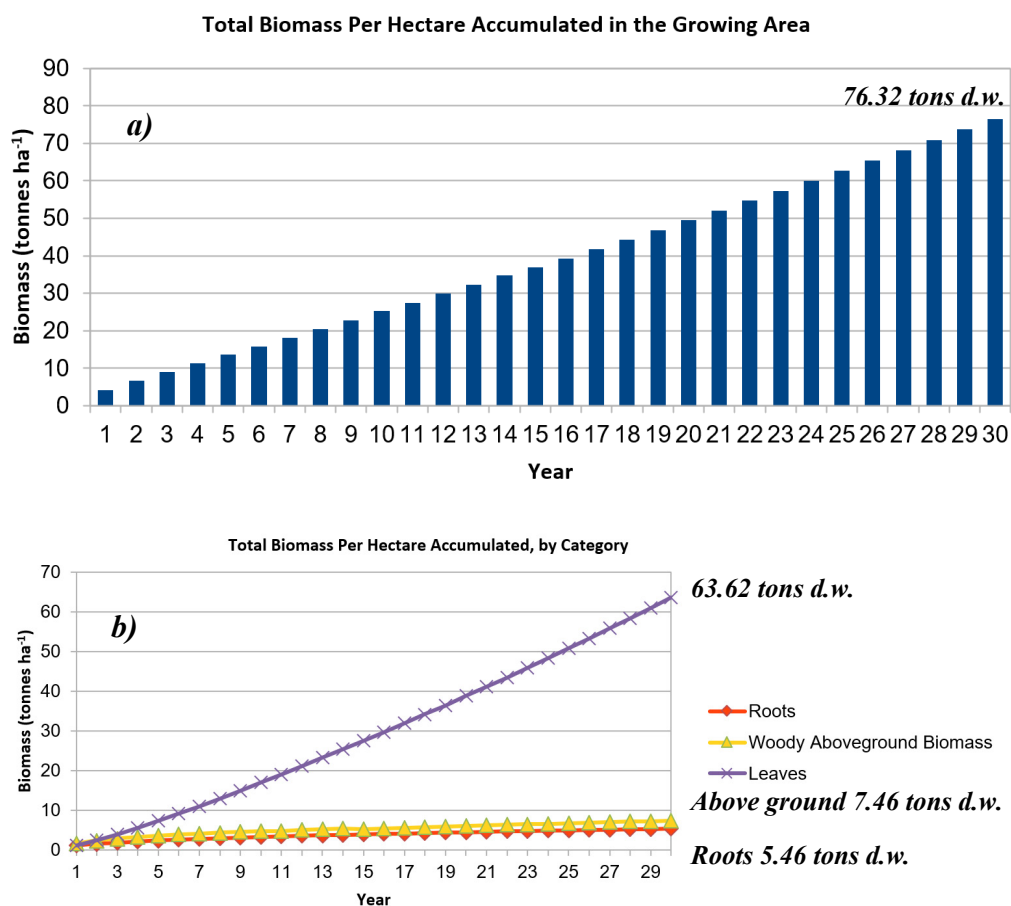

**Figure S6.** a) Total biomass (grapes excluded). b) Leaf, woody above ground and roots biomass (grapes excluded).

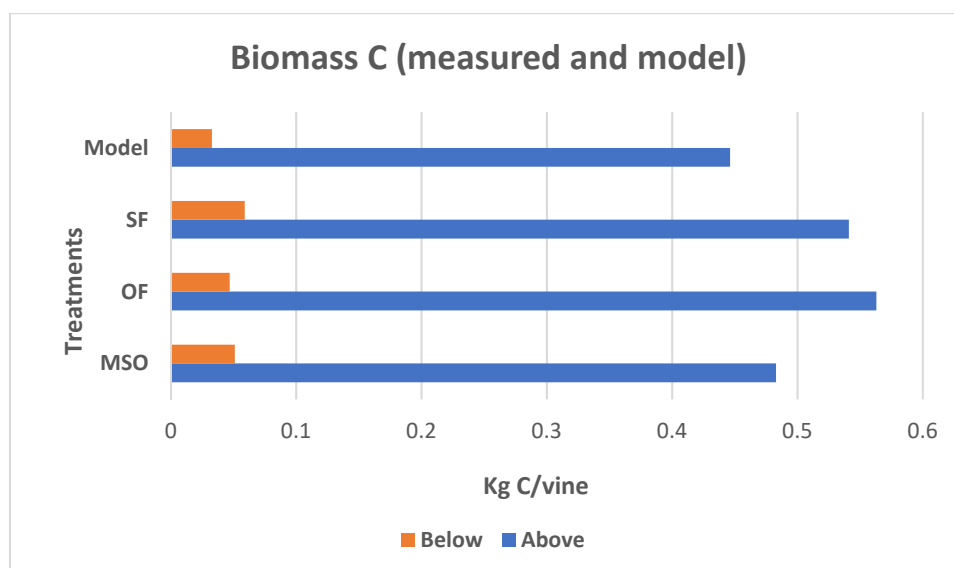

**Figure S7.** Modelled and measured C for above and below ground biomass. A, B, C are the 3 treatments. Biomass C was assumed to be equal to 50% of the d.w. of the vine parts.

Access to the excel tool used for modelling and described in section 2.6.1 of the manuscript:

[https://www.dropbox.com/s/746ry6lf6wrsgfa/Ecowinery\\_EXPA\\_160422\\_New.xlsm?dl=0](https://www.dropbox.com/s/746ry6lf6wrsgfa/Ecowinery_EXPA_160422_New.xlsm?dl=0)
